# Supplementary material for: Analysis of circulating tumour DNA to monitor disease burden following colorectal cancer surgery
Source: HighWire-hosted journal article supplement (doi:10.1136/gutjnl-2014-308859), 2015-02-04
Supplement: gutjnl-2014-308859supp_tables.pdf [file gutjnl-2014-308859supp_tables.pdf]

**Supplementary Table 1.** Summary of samples, assays made, and analyses performed.

| <b>Patient ID</b> | <b>Sample ID</b> | <b>Tumor %</b> | <b>SNP</b> | <b>Mate pair</b> | <b>ddPCR</b> | <b>Pipeline 1</b> | <b>Pipeline 2</b> |
|-------------------|------------------|----------------|------------|------------------|--------------|-------------------|-------------------|
| <b>1</b>          | 01-blood         | N/A*           | Yes        | No               | Yes          | Yes               | No                |
| <b>2</b>          | 02-blood         | N/A            | Yes        | No               | Yes          | Yes               | No                |
| <b>4</b>          | 04-blood         | N/A            | Yes        | No               | Yes          | Yes               | No                |
| <b>5</b>          | 05-blood         | N/A            | Yes        | Yes              | Yes          | Yes               | Yes               |
| <b>6</b>          | 06-blood         | N/A            | Yes        | No               | Yes          | Yes               | No                |
| <b>8</b>          | 08-blood         | N/A            | Yes        | Yes              | Yes          | Yes               | Yes               |
| <b>10</b>         | 10-blood         | N/A            | Yes        | Yes              | Yes          | Yes               | Yes               |
| <b>15</b>         | 15-blood         | N/A            | Yes        | No               | Yes          | Yes               | No                |
| <b>16</b>         | 16-blood         | N/A            | Yes        | Yes              | Yes          | Yes               | Yes               |
| <b>18</b>         | 18-blood         | N/A            | Yes        | Yes              | Yes          | Yes               | Yes               |
| <b>19</b>         | 19-blood         | N/A            | Yes        | No               | Yes          | Yes               | No                |
| <b>24</b>         | 24-blood         | N/A            | No         | Yes              | No           | No                | Yes               |
| <b>28</b>         | 28-blood         | N/A            | No         | Yes              | No           | No                | Yes               |
| <b>29</b>         | 29-blood         | N/A            | No         | Yes              | No           | No                | Yes               |
| <b>1</b>          | 01-tumor         | 90             | Yes        | Yes              | Yes          | Yes               | No                |
| <b>2</b>          | 02-tumor         | 90             | Yes        | Yes              | Yes          | Yes               | No                |
| <b>4</b>          | 04-tumor         | 80             | Yes        | Yes              | Yes          | Yes               | No                |
| <b>5</b>          | 05-tumor         | 75             | Yes        | Yes              | Yes          | Yes               | Yes               |
| <b>6</b>          | 06-tumor         | 65             | Yes        | Yes              | Yes          | Yes               | No                |
| <b>8</b>          | 08-tumor         | 75             | Yes        | Yes              | Yes          | Yes               | Yes               |
| <b>10</b>         | 10-tumor         | 90             | Yes        | Yes              | Yes          | Yes               | Yes               |
| <b>15</b>         | 15-tumor         | 75             | Yes        | Yes              | Yes          | Yes               | No                |
| <b>16</b>         | 16-tumor         | 70             | Yes        | Yes              | Yes          | Yes               | Yes               |
| <b>18</b>         | 18-tumor         | 90             | Yes        | Yes              | Yes          | Yes               | Yes               |
| <b>19</b>         | 19-tumor         | 75             | Yes        | Yes              | Yes          | Yes               | No                |
| <b>24</b>         | 24-tumor         | 75             | No         | Yes              | No           | Yes               | Yes               |
| <b>28</b>         | 28-tumor         | 65             | No         | Yes              | No           | Yes               | Yes               |
| <b>29</b>         | 29-tumor         | 60             | No         | Yes              | No           | Yes               | Yes               |
| <b>18</b>         | 18-metastasis    | 60             | No         | Yes              | Yes          | N/A               | Yes               |
| <b>24</b>         | 24-metastasis    | 50             | No         | Yes              | No           | N/A               | Yes               |
| <b>28</b>         | 28-metastasis    | 75             | No         | Yes              | No           | N/A               | Yes               |
| <b>29</b>         | 29-metastasis    | 60             | No         | Yes              | No           | N/A               | Yes               |

\*Not applicable

**Supplementary Table 2.** Summary of tissue samples and their mate pair characteristics.

| <b>Sample ID</b>     | <b>MP protocol</b> | <b>Mapped reads</b> | <b>Estimated read length</b> | <b>Useful reads (GB)</b> | <b>Read depth*</b> | <b>Median insert size</b> | <b>Physical read depth</b> |
|----------------------|--------------------|---------------------|------------------------------|--------------------------|--------------------|---------------------------|----------------------------|
| <b>5-blood</b>       | Transposon         | 73,883,169          | 87                           | 6.4                      | 2.2                | 2994                      | 37                         |
| <b>8-blood</b>       | MP library v2      | 72,990,196          | 100                          | 7.3                      | 2.5                | 3122                      | 39                         |
| <b>10-blood</b>      | MP library v2      | 82,981,371          | 100                          | 8.3                      | 2.9                | 2982                      | 42                         |
| <b>16-blood</b>      | MP library v2      | 75,600,526          | 100                          | 7.6                      | 2.6                | 2989                      | 39                         |
| <b>18-blood</b>      | Transposon         | 95,614,208          | 83                           | 8.0                      | 2.8                | 4392                      | 71                         |
| <b>24-blood</b>      | Transposon         | 77,825,341          | 82                           | 6.4                      | 2.2                | 2529                      | 32                         |
| <b>28-blood</b>      | Transposon         | 40,224,075          | 85                           | 3.4                      | 1.2                | 1789                      | 12                         |
| <b>29-blood</b>      | Transposon         | 83,954,028          | 84                           | 7.1                      | 2.4                | 3090                      | 44                         |
| <b>1-tumor</b>       | MP library v2      | 21,513,384          | 100                          | 1.1                      | 0.4                | 2193                      | 7                          |
| <b>2-tumor</b>       | MP library v2      | 67,991,066          | 100                          | 3.4                      | 1.2                | 2406                      | 28                         |
| <b>4-tumor</b>       | MP library v2      | 33,055,958          | 100                          | 3.3                      | 1.1                | 2073                      | 12                         |
| <b>5-tumor</b>       | MP library v2      | 42,324,457          | 100                          | 2.1                      | 0.7                | 2773                      | 20                         |
| <b>6-tumor</b>       | MP library v2      | 30,660,816          | 100                          | 1.5                      | 0.5                | 2563                      | 13                         |
| <b>8-tumor</b>       | MP library v2      | 48,652,103          | 100                          | 4.9                      | 1.7                | 2468                      | 20                         |
| <b>10-tumor</b>      | MP library v2      | 39,337,693          | 100                          | 3.9                      | 1.4                | 2938                      | 20                         |
| <b>15-tumor</b>      | MP library v2      | 37,136,110          | 100                          | 1.9                      | 0.6                | 3051                      | 19                         |
| <b>16-tumor</b>      | MP library v2      | 37,484,956          | 100                          | 3.8                      | 1.3                | 1662                      | 11                         |
| <b>18-tumor</b>      | MP library v2      | 25,056,830          | 100                          | 2.5                      | 0.9                | 2856                      | 12                         |
| <b>19-tumor</b>      | MP library v2      | 75,551,380          | 100                          | 3.8                      | 1.3                | 2922                      | 38                         |
| <b>24-tumor</b>      | MP library v2      | 64,894,996          | 100                          | 6.5                      | 2.2                | 2840                      | 31                         |
| <b>28-tumor</b>      | MP library v2      | 29,999,326          | 100                          | 3.0                      | 1.0                | 2867                      | 15                         |
| <b>29-tumor</b>      | MP library v2      | 18,614,829          | 100                          | 1.9                      | 0.6                | 2965                      | 9                          |
| <b>18-metastasis</b> | Transposon         | 95,038,956          | 87                           | 8.3                      | 2.9                | 1192                      | 47                         |
| <b>24-metastasis</b> | Transposon         | 92,742,464          | 84                           | 7.8                      | 2.7                | 2687                      | 41                         |
| <b>28-metastasis</b> | Transposon         | 102,212,707         | 84                           | 8.6                      | 3.0                | 2709                      | 46                         |
| <b>29-metastasis</b> | MP library v2      | 14,900,356          | 100                          | 1.5                      | 0.5                | 2902                      | 7                          |

\*Read depth equals Useful Reads / 2.897310462

**Supplementary Table 3.** Primer and TaqMan probe sequences and amplification protocols for PCR validation, Nested PCR, and ddPCR. All probes contain a 6FAM or HEX fluorophore at the 5' end and a black hole quencher-1 (BHQ-1) at the 3' end.

| <b>Pt. ID-SSV (Assay)</b>                     | <b>Sense primer (5'-3')</b><br><b>Antisense primer (5'-3')</b><br><b>Probe (5'-3')</b> | <b>Amplification protocols</b>                          |
|-----------------------------------------------|----------------------------------------------------------------------------------------|---------------------------------------------------------|
| <b>Chr3 (Reference)</b>                       | CTAGAAGATCTACCTCCAAGAGG<br>CCAGGCTGAAGCTATTCCAG<br>CTCATACTCTGGCATATGGGCTGG            | 95°C 10', (95°C 30'', 58°C 30'') x45 & 98°C 10'         |
| <b>gCYC (Reference)</b>                       | ACATGGGTACTAAGCAACAAAATAAG<br>CACAATTGGAACATCTTTGTTAAAC<br>TTGCAGACAAGGTCCCAAAGACAGCA  | 95°C 10', (95°C 30'', 58°C 30'') x45 & 98°C 10'         |
| <b>CPP1 (Purification control)</b>            | Reference 1                                                                            | 95°C 10', (95°C 30'', 58°C 30'') x45 & 98°C 10'         |
| <b>PBC (Lymphocyte contamination control)</b> | Reference 1                                                                            | 95°C 10', (95°C 30'', 58°C 30'') x45 & 98°C 10'         |
| <b>1-C1I1 (Validation)</b>                    | GGACCCAGACAAGTGTGAC<br>GTCCGTGGCTCCACAATTAC                                            | 95°C 15', (95°C 30'', 58°C 30'', 72°C 2') x40 & 72°C 5' |
| <b>1-C2D1 (Validation)</b>                    | CAACTGCCCAAGCAAATACA<br>GGGAGGATTTGAGCTTATCT                                           | 95°C 15', (95°C 30'', 58°C 30'', 72°C 2') x40 & 72°C 5' |
| <b>1-C11D1 (Validation)</b>                   | CTATGCAGGAGATGGGCTTG<br>CTGAGGGTGGGTGGATAAGA                                           | 95°C 15', (95°C 30'', 58°C 30'', 72°C 2') x40 & 72°C 5' |
| <b>1-C16D3 (Validation)</b>                   | TGGTCCCAGTATGGTTAGATGA<br>CCCACCTCCTTAGGTTTTTC                                         | 95°C 15', (95°C 30'', 58°C 30'', 72°C 2') x40 & 72°C 5' |
| <b>1-C16d1 (Validation)</b>                   | CCAGCATCATTATGGAGTC<br>TTCTGGGGTTTCTGGTGTTC                                            | 95°C 15', (95°C 30'', 58°C 30'', 72°C 2') x40 & 72°C 5' |
| <b>2-C1D1 (Validation)</b>                    | GGCAAGTTTTTGAGGAAAAGG<br>CAGGAGGCAGTCCTGAATTT                                          | 95°C 15', (95°C 30'', 58°C 30'', 72°C 2') x40 & 72°C 5' |
| <b>2-C3D1 (Validation)</b>                    | TCCCTGCTTTAATTTGAGGT<br>TCCATAGGGTTTGCATATGTCTC                                        | 95°C 15', (95°C 30'', 58°C 30'', 72°C 2') x40 & 72°C 5' |
| <b>2-C3D2 (Validation)</b>                    | TTAGAGGTCATGGCCACATTT<br>GGGTTCAACAGTTCATCAAAGG                                        | 95°C 15', (95°C 30'', 58°C 30'', 72°C 2') x40 & 72°C 5' |
| <b>2-C3D3 (Validation)</b>                    | CACCCACACCAGGCATACA<br>AACCCCAAACATAAGAATCCTAGC                                        | 95°C 15', (95°C 30'', 58°C 30'', 72°C 2') x40 & 72°C 5' |
| <b>2-4D1 (Validation)</b>                     | GTGTGGGCACATTTGTTTCAT<br>GGCATGATGAATGGGGTAAA                                          | 95°C 15', (95°C 30'', 58°C 30'', 72°C 2') x40 & 72°C 5' |
| <b>2-C7D1 (Validation)</b>                    | TTTATGTTAGCTCTATGGTTTTGTAGA<br>AGAAAACATTCCAGGCCAGA                                    | 95°C 15', (95°C 30'', 58°C 30'', 72°C 2') x40 & 72°C 5' |
| <b>2-C11D1 (Validation)</b>                   | GAAGGAGTAGAGTAAACAAGGAAAAGA<br>TTCCTCAGAAAACAGATGCTCA                                  | 95°C 15', (95°C 30'', 58°C 30'', 72°C 2') x40 & 72°C 5' |
| <b>2-C13ITX2 (Validation)</b>                 | GAAGTCCCTTTCTACCCAACCC<br>CAATGGCTAGCCCACCTCAT                                         | 95°C 15', (95°C 30'', 58°C 30'', 72°C 2') x40 & 72°C 5' |
| <b>4-C1D1 (Validation)</b>                    | TCCCAACTGTTACTGTACTGC<br>AAGCATTTGACTTTGGCTTG                                          | 95°C 15', (95°C 30'', 58°C 30'', 72°C 2') x40 & 72°C 5' |
| <b>4-C2D1 (Validation)</b>                    | TGTCCTTAAATGTCCTTAAATGC<br>TCTCTGTTAAAACCAGCATTCCG                                     | 95°C 15', (95°C 30'', 58°C 30'', 72°C 2') x40 & 72°C 5' |
| <b>4-C2D2 (Validation)</b>                    | GGGTTGAGGATGGAATTTGA<br>CAAAATCATACAAAAGCTCACTCA                                       | 95°C 15', (95°C 30'', 58°C 30'', 72°C 2') x40 & 72°C 5' |
| <b>4-C7D1 (Validation)</b>                    | CCCTAGTCCAGGTGCTTCAG<br>GTCCAGCAAGAGCCCTAGAA                                           | 95°C 15', (95°C 30'', 58°C 30'', 72°C 2') x40 & 72°C 5' |
| <b>4-C10D1 (Validation)</b>                   | ATCCCTTTGAGAGCCAGTCA<br>CCACGGCACTGGGAGTAAAT                                           | 95°C 15', (95°C 30'', 58°C 30'', 72°C 2') x40 & 72°C 5' |
| <b>4-C16D1 (Validation)</b>                   | TTCATAATACAGGAACAAGAGTGTA<br>GTTCCCCAGGTGAGCTAAAG                                      | 95°C 15', (95°C 30'', 58°C 30'', 72°C 2') x40 & 72°C 5' |
| <b>4-C18D1 (Validation)</b>                   | AGAGTTCCTTTAGGTCTGTTGTGA<br>CCCTGGGCATAGTTGAGAAC                                       | 95°C 15', (95°C 30'', 58°C 30'', 72°C 2') x40 & 72°C 5' |
| <b>5-C1D1 (Validation)</b>                    | CAAGGGCTATCTGGCATCTT                                                                   | 95°C 15', (95°C 30'', 58°C 30'', 72°C 2') x40 & 72°C 5' |

|                               |                                                    |                                                       |
|-------------------------------|----------------------------------------------------|-------------------------------------------------------|
| <b>5-C1D1 (Validation)</b>    | AAGACGTGCAAGCCTTATATTACA                           | 95°C 15', (95°C 30', 58°C 30', 72°C 2') x40 & 72°C 5' |
| <b>5-C1D2 (Validation)</b>    | GGGTGTGCACTCTCGTCTCT<br>TGCCAGAGTCACAAAAATGG       | 95°C 15', (95°C 30', 58°C 30', 72°C 2') x40 & 72°C 5' |
| <b>5-C1I1 (Validation)</b>    | AACAACCTGGCACTCAAGAGGA<br>AACTTTTGTGACGCTTGTGC     | 95°C 15', (95°C 30', 58°C 30', 72°C 2') x40 & 72°C 5' |
| <b>5-C5D1 (Validation)</b>    | TGCTTTGATTTTATAGCATGACC<br>AGGAGCTTATGGAAGTCAGGT   | 95°C 15', (95°C 30', 58°C 30', 72°C 2') x40 & 72°C 5' |
| <b>5-C12D1 (Validation)</b>   | TGGTCCAGGAAGAGTGAGAC<br>AACAGACACATAGACCAGTGGAAAC  | 95°C 15', (95°C 30', 58°C 30', 72°C 2') x40 & 72°C 5' |
| <b>6-C10ITX1 (Validation)</b> | TGTTGTGTTTTAAAACCAGTAATTTGA<br>CACCTAGCTTGCACTGTGA | 95°C 15', (95°C 30', 58°C 30', 72°C 2') x40 & 72°C 5' |
| <b>6-C20D2 (Validation)</b>   | TTCCCCTCCAACAGTGAAAC<br>GCAAAAGGTTTTGAAAATGG       | 95°C 15', (95°C 30', 58°C 30', 72°C 2') x40 & 72°C 5' |
| <b>6-20D3 (Validation)</b>    | CTAAGCACAGAAGGTACTAGAGAACA<br>GAAACTGCCTCGCAAATCAT | 95°C 15', (95°C 30', 58°C 30', 72°C 2') x40 & 72°C 5' |
| <b>6-C20I1 (Validation)</b>   | TGTCAGGGTCAGGATTTGAA<br>GGCTGCTCCACAGACACTG        | 95°C 15', (95°C 30', 58°C 30', 72°C 2') x40 & 72°C 5' |
| <b>6-C20ITX1 (Validation)</b> | TTCTGACTGGGGATTTTCTG<br>AATCCTCAATCCGACTTTGG       | 95°C 15', (95°C 30', 58°C 30', 72°C 2') x40 & 72°C 5' |
| <b>8-C1D1 (Validation)</b>    | CCATTCCACACCCACATACT<br>GTTGGCGGAGTTCAGAATTA       | 95°C 15', (95°C 30', 58°C 30', 72°C 2') x40 & 72°C 5' |
| <b>8-C3D1 (Validation)</b>    | GTAAGATCGGGAGGGAAAGAA<br>CAGGAGTGGCTCTTCTCAA       | 95°C 15', (95°C 30', 58°C 30', 72°C 2') x40 & 72°C 5' |
| <b>8-C7D1 (Validation)</b>    | TAGGGGTGCTCCACCTTCAG<br>CTGAAACCTCTGCTTTGGAACG     | 95°C 15', (95°C 30', 58°C 30', 72°C 2') x40 & 72°C 5' |
| <b>8-C15D1 (Validation)</b>   | GTAAGCGACCTCAGCGTTT<br>GCTTGTCATCTTAGACACTGAAAC    | 95°C 15', (95°C 30', 58°C 30', 72°C 2') x40 & 72°C 5' |
| <b>8-C16D1 (Validation)</b>   | ATGGATTTGCCTATGTCCAA<br>GCTGGCATTTCAGTGTCTC        | 95°C 15', (95°C 30', 58°C 30', 72°C 2') x40 & 72°C 5' |
| <b>8-C16D2 (Validation)</b>   | CCTTAAGTTGCGCCTGTTTA<br>GTGAGCATCCAAGGTAGGAA       | 95°C 15', (95°C 30', 58°C 30', 72°C 2') x40 & 72°C 5' |
| <b>8-C16D3 (Validation)</b>   | TGACCAGGTGTGGATGGAGA<br>AGTACGGCAGTGCAAACACA       | 95°C 15', (95°C 30', 58°C 30', 72°C 2') x40 & 72°C 5' |
| <b>10-C3D1 (Validation)</b>   | AAGTTTTTGTCTTGCTTGG<br>GCTGGTACTCCTCTCCTGT         | 95°C 15', (95°C 30', 58°C 30', 72°C 2') x40 & 72°C 5' |
| <b>10-C6D1 (Validation)</b>   | GTGTCAGACTGAAGAGGTATGG<br>GCCATAGTTAGCCAATCCCTA    | 95°C 15', (95°C 30', 58°C 30', 72°C 2') x40 & 72°C 5' |
| <b>10-C7D1 (Validation)</b>   | AAACTCGCTCCAGATCATCC<br>TGTCAGTTGTACCTGCAGCT       | 95°C 15', (95°C 30', 58°C 30', 72°C 2') x40 & 72°C 5' |
| <b>10-C7D2 (Validation)</b>   | CCCAGAACGGTGAGTAAATG<br>CTGCAAAATCATGCCAAAA        | 95°C 15', (95°C 30', 58°C 30', 72°C 2') x40 & 72°C 5' |
| <b>10-C9D1 (Validation)</b>   | TGGCTTTCAATGGGATCATA<br>AGAAACCGGTTGGAGGTAAC       | 95°C 15', (95°C 30', 58°C 30', 72°C 2') x40 & 72°C 5' |
| <b>15-C12D1 (Validation)</b>  | GGGAGGGTGAGAAAGAGGAG<br>TCATTTCCCTGCTCCAAAAC       | 95°C 15', (95°C 30', 58°C 30', 72°C 2') x40 & 72°C 5' |
| <b>15-C12I1 (Validation)</b>  | ATCTGGCTTGTA AAAACTGGGTG<br>CAATGGGGGAAACTGGAAAG   | 95°C 15', (95°C 30', 58°C 30', 72°C 2') x40 & 72°C 5' |
| <b>15-C12D2 (Validation)</b>  | TTTAATCAGTTTTTCTTCCATCCT<br>AATGCCTTGGATGAGCTGAG   | 95°C 15', (95°C 30', 58°C 30', 72°C 2') x40 & 72°C 5' |
| <b>15-C12I2 (Validation)</b>  | GTCTTGTCCCCTTCGCAGAC<br>CAGCTTCCATTGTCCCTCTC       | 95°C 15', (95°C 30', 58°C 30', 72°C 2') x40 & 72°C 5' |
| <b>15-C14D1 (Validation)</b>  | CCTTCACTGTCGCTGAGGAT<br>TGATCTTAAAGCTACAGAGTGACTGG | 95°C 15', (95°C 30', 58°C 30', 72°C 2') x40 & 72°C 5' |
| <b>16-C6D3 (Validation)</b>   | GGAATCCGACTACAGGGTTT<br>TGCCATTAGACTGGACTGGT       | 95°C 15', (95°C 30', 58°C 30', 72°C 2') x40 & 72°C 5' |
| <b>16-C6D1 (Validation)</b>   | TGAACCAAGAGCAAACAATC<br>CTTTGCCCATGTTCTCTGTC       | 95°C 15', (95°C 30', 58°C 30', 72°C 2') x40 & 72°C 5' |
| <b>16-C14D1 (Validation)</b>  | TTGAGTAGCTCTCCACCTG<br>CTATGGCCCCCTATTCAACT        | 95°C 15', (95°C 30', 58°C 30', 72°C 2') x40 & 72°C 5' |

|                                    |                                                                                       |                                                         |
|------------------------------------|---------------------------------------------------------------------------------------|---------------------------------------------------------|
| <b>16-C16D1 (Validation)</b>       | AGCCCTCCTCTGCAATAGTT<br>CACACCTGACACAGCACATT                                          | 95°C 15', (95°C 30'', 58°C 30'', 72°C 2') x40 & 72°C 5' |
| <b>18-C3D1 (Validation)</b>        | TCCTGCTGAATTACCTATTTCG<br>GAAAAGGAAACAAATGCACAG                                       | 95°C 15', (95°C 30'', 58°C 30'', 72°C 2') x40 & 72°C 5' |
| <b>18-C16D1 (Validation)</b>       | CAAAGGCAAGGACAGAAATG<br>CACACATCGAGATGCTCTGT                                          | 95°C 15', (95°C 30'', 58°C 30'', 72°C 2') x40 & 72°C 5' |
| <b>18-C16D1 (Validation)</b>       | CAGGAGACAAAGCTTACTGCC                                                                 | 95°C 15', (95°C 30'', 58°C 30'', 72°C 2') x40 & 72°C 5' |
| <b>18-C16D2 (Validation)</b>       | CCCATCACTGCATCATATTG<br>ATTTACTTTGGGGCTCATGG                                          | 95°C 15', (95°C 30'', 58°C 30'', 72°C 2') x40 & 72°C 5' |
| <b>18-C16D3 (Validation)</b>       | TTGCAAGCTATTTCAGTCAACTC<br>TCCTTTCTTTCCCTTCAGTGG                                      | 95°C 15', (95°C 30'', 58°C 30'', 72°C 2') x40 & 72°C 5' |
| <b>18-C20D1 (Validation)</b>       | CAATAAACCCACAAACAGC<br>GGCCACCTATTGACATCATC                                           | 95°C 15', (95°C 30'', 58°C 30'', 72°C 2') x40 & 72°C 5' |
| <b>18-C20D2 (Validation)</b>       | CCCCTCTGCACTTAGTGTGT<br>TATTCCTCCATGCCACTGAT                                          | 95°C 15', (95°C 30'', 58°C 30'', 72°C 2') x40 & 72°C 5' |
| <b>19-C5D1 (Validation)</b>        | AAACGAAAAGGAAGAAAAATGA<br>CTGTCCCAGTTTGGGTTTTTC                                       | 95°C 15', (95°C 30'', 58°C 30'', 72°C 2') x40 & 72°C 5' |
| <b>19-C8I1 (Validation)</b>        | CTAACTCAAGACACAAGGCAC<br>TCCTTTCATAGGGATACAACATGG                                     | 95°C 15', (95°C 30'', 58°C 30'', 72°C 2') x40 & 72°C 5' |
| <b>19-C12D1 (Validation)</b>       | AACAGCCCTACCTTCCCCT<br>CCACTCTACATTCCACAGATGC                                         | 95°C 15', (95°C 30'', 58°C 30'', 72°C 2') x40 & 72°C 5' |
| <b>19-C12D2 (Validation)</b>       | AACAGCCCTACCTTCCCCT<br>CCACTCTACATTCCACAGATGC                                         | 95°C 15', (95°C 30'', 58°C 30'', 72°C 2') x40 & 72°C 5' |
| <b>19-C13T(13:8)1 (Validation)</b> | CTCTGCCTCACACCCAGAA<br>CCGAAATGTCCAATAGCAAAA                                          | 95°C 15', (95°C 30'', 58°C 30'', 72°C 2') x40 & 72°C 5' |
| <b>19-C13T(13:8)2 (Validation)</b> | GAAATGAATAAGCTGGTTTTGCT<br>CTCTGGGAGGCTAAACTTTTGT                                     | 95°C 15', (95°C 30'', 58°C 30'', 72°C 2') x40 & 72°C 5' |
| <b>1-C1I1 (ddPCR)</b>              | GCAGGAGGTACACAGGAAGTAT<br>TTGCCACCTTCCATAGATTT<br>TGTGAGGCAAGAGCAGTCTGG               | 95°C 10', (95°C 30'', 59°C 30'') x45 & 98°C 10'         |
| <b>1-C2D1 (ddPCR)</b>              | TTTGTCTTCTTAATTAATGCCTTTGA<br>TCAGGGGATTTGTTTGAAGTC<br>CCTACTGGTTGCAGCAGCTTCA         | 95°C 10', (95°C 30'', 59°C 30'') x45 & 98°C 10'         |
| <b>1-C11D1 (ddPCR)</b>             | GACCCTACCTATGGTTGTGAGAGT<br>AGCTGGGTGTATTGTAATCCCACA<br>AATGGCCCACGGGTCTGCTG          | 95°C 10', (95°C 30'', 59°C 30'') x45 & 98°C 10'         |
| <b>1-C16D3 (ddPCR)</b>             | TGCTGCACATTTACACCGTTC<br>TTTCTCCCAACTTCAATCATATACCA<br>TAGGCTTTCGCATTTTCACCTTACCACC   | 95°C 10', (95°C 30'', 59°C 30'') x45 & 98°C 10'         |
| <b>1-C16d1 (ddPCR)</b>             | GGCTCATGTGGTTCAGGAAG<br>CGCATGGAACCAAGATGAAT<br>GAATGCAGGGAGTTATTAACCTCA              | 95°C 10', (95°C 30'', 59°C 30'') x45 & 98°C 10'         |
| <b>2-C1D1 (ddPCR)</b>              | TTGGCTTGGAGATATCTGAAAAGTGT<br>TGCACTAGAAATTCAGTCATGCCT<br>AATGAGGGTGGAAATAAGCTTGCCTCT | 95°C 10', (95°C 30'', 59°C 30'') x45 & 98°C 10'         |
| <b>2-C3D1 (ddPCR)</b>              | GATCTAGGGGTAAACTCTACTGAA<br>TGCAGCCCTTGTATATTGGATG<br>TATGGTTGCTTTTGGTGGAAACCCCTT     | 95°C 10', (95°C 30'', 59°C 30'') x45 & 98°C 10'         |
| <b>2-4D1 (ddPCR)</b>               | CATAACTTTTTCAACAAGCATCCA<br>GGGCACATTTGTTTATAATATTTTC<br>TCCTTTAGGCCCAATATCTGAAAGATAA | 95°C 10', (95°C 30'', 59°C 30'') x45 & 98°C 10'         |
| <b>2-C11D1 (ddPCR)</b>             | ATTTGGCACTATCAGCAAAGTATTA<br>AGTTCTGGGTACAATTCTAGAGC<br>ACTGAAATTAAGGCAGAGAGACCTGGA   | 95°C 10', (95°C 30'', 59°C 30'') x45 & 98°C 10'         |
| <b>2-C13ITX2 (ddPCR)</b>           | TTCACTCTCATTGCTGAGTGGT<br>AGAGAAGCCCACACAGGTTG<br>TTGCCGACTCACCTGCTTCT                | 95°C 10', (95°C 30'', 59°C 30'') x45 & 98°C 10'         |

|                          |                                                                                           |                                                           |
|--------------------------|-------------------------------------------------------------------------------------------|-----------------------------------------------------------|
| <b>4-C1D1d (ddPCR)</b>   | TCCCCAACTGTTACTGTACTG<br>ATCTATTCAAGGCATATATAGCTACA<br>TTGCTGTAAGGACTCTGAAGGACT           | 95°C 10', (95°C 30'', 58°C 30'') x45 & 98°C 10'           |
| <b>4-C2D1d (ddPCR)</b>   | TTTGGTCTGTTTATGGAGATGAAG<br>AGCTGAACCATATAGGCTG<br>ATTCCAAGAAAACCAAAGTTGACCCA             | 95°C 10', (95°C 30'', 58°C 30'') x45 & 98°C 10'           |
| <b>4-C7D1d (ddPCR)</b>   | GCCTTCCTAAATCCTCATGTGT<br>CTATATGAGAAAGGGAAAATTTGTGT<br>ACCTGGTCTGCCACAATTCCAC            | 95°C 10', (95°C 30'', 58°C 30'') x45 & 98°C 10'           |
| <b>4-C10D1d (ddPCR)</b>  | TATGTTATACAAAATTGTCCCACGAG<br>TGATTTCTGTCCAAGGTGC<br>ACACTGAAGTATGCCACGGTT                | 95°C 10', (95°C 30'', 58°C 30'') x45 & 98°C 10'           |
| <b>5-C1D2 (ddPCR)</b>    | TTGGTCTTCTGTCAATCTC<br>GGAGTGCAGTGGTGTGAG<br>TTTTGACATACCCTATTCTCCTGC                     | 95°C 10', (95°C 30'', 57°C 30'') x45 & 98°C 10'           |
| <b>5-C1I1 (ddPCR)</b>    | CTTCGGGACCTTGAACCTTG<br>TTTGGGTGTATACCCGTTCC<br>TCCATATTCTTGGAACTGTGTACCCA                | 95°C 10', (95°C 30'', 57°C 30'') x45 & 98°C 10'           |
| <b>5-C5D1 (ddPCR)</b>    | TGACCTGTATGAGTAAGCATATAAAAT<br>TGGTTTTGTGTTATAATCTTGTCTC<br>TTAGAGCCTACTAAAATGATCAAGATCTC | 95°C 10', (95°C 30'', 61°C 30'') x45 & 98°C 10'           |
| <b>5-C12D1 (ddPCR)</b>   | GCCACACAGCTGATTTAGAGG<br>ACCCACAAGAAAACCAAAG<br>TCTTCTGGCCATTACTCTTAAGCA                  | 95°C 10', (95°C 30'', 57°C 30'') x45 & 98°C 10'           |
| <b>6-C10ITX1 (ddPCR)</b> | CCGGGTTCTTCCCTTCT<br>TTTATACCCAGACAGTTCTCCA<br>ACCTCCTGTGATCCTGGCCC                       | 95°C 10', (95°C 30'', 59°C 30'') x45 & 98°C 10'           |
| <b>6-C20D2 (ddPCR)</b>   | AAGGATTGTGTGTATCTGTGATGTC<br>CTCTGTCTGCCTCCCTCTA<br>AAATCATAACATTAGGGGATTTGTTC            | 95°C 10', (95°C 30'', 56°C 30'') x45 & 98°C 10'           |
| <b>6-20D3 (ddPCR)</b>    | TTCTCCATGAGCCCTCTC<br>CACTGTTCATCCATAGCAGCTC<br>CCACCACACAATGCCAAGCA                      | 95°C 10', (95°C 30'', 59°C 30'') x45 & 98°C 10'           |
| <b>6-C20I1 (ddPCR)</b>   | ACACCGCCAAGGTGAATTT<br>TCCGGTCTATCACCAGCTTC<br>CACCTAGAGGTCCCAGG                          | 95°C 10', (95°C 30'', 59°C 30'') x45 & 98°C 10'           |
| <b>8-C1D1d (ddPCR)</b>   | CGCAACATGAATGAATGTCAGA<br>AGCCAAGCCAGAGAGAGG<br>AGTTCCAATCCTTCCCAGTCAGCTGCA               | 95°C 10', (95°C 30'', 58°C 30'') x45 & 98°C 10'           |
| <b>8-C3D1d (ddPCR)</b>   | TGTCTTCCCTGAGTGACCAT<br>ACGCTATAAATTGGCCTTTG<br>CAATGAAGCCAGAGACCATGCATG                  | 95°C 10', (95°C 30'', 58°C 30'') x45 & 98°C 10'           |
| <b>8-C7D1d (ddPCR)</b>   | TCACAGCTTCAACAAGTTTGC<br>TCAAGCTCTAACAGTCTTCAAACATA<br>TGGAACAAGTGAAGAGATGTGGTTT          | 95°C 10', (95°C 30'', 58°C 30'') x45 & 98°C 10'           |
| <b>8-C15D1d (ddPCR)</b>  | CCCTGTGGGCTGCAAAGATT<br>ACAGAACCAGGTGAGAGCTG<br>CCACCCTGGTGTCTTTCAGCTCA                   | 95°C 10', (95°C 30'', 58°C 30'') x45 & 98°C 10'           |
| <b>8-C16D2d (ddPCR)</b>  | AGAGCTTACAAGAGCACCT<br>AGTATTTATAGTCTTTCAGTACCTCG<br>CTCTCTGAGCACTCCCCGTGT                | 95°C 10', (95°C 30'', 58°C 30'') x45 & 98°C 10'           |
| <b>10-C3D1N (Nested)</b> | TATGCCAGAGATTGCAAATGT<br>CCAGCAAGCTATCACGTAGG                                             | 95°C 15', (95°C 30'', 58°C 30'', 72°C 45'') x12 & 72°C 5' |
| <b>10-C3D1d (ddPCR)</b>  | GCCAGAGATTGCAAATGTTT<br>TGGAAAAAGTGAAGTACATGAA<br>CATAAGTTTAGTGTCTTTCGGCTCGGA             | 95°C 10', (95°C 30'', 58°C 30'') x45 & 98°C 10'           |
| <b>10-C6D1N (Nested)</b> | GGGACTTTGAAATTCTGAGATG                                                                    | 95°C 15', (95°C 30'', 58°C 30'', 72°C 45'') x12 & 72°C    |

|                           |                                                                                                            |                                                           |
|---------------------------|------------------------------------------------------------------------------------------------------------|-----------------------------------------------------------|
| <b>10-C6D1N (Nested)</b>  | GAGGTGTTTTAATTAACAATCTTGAG                                                                                 | 5'                                                        |
| <b>10-C6D1d (ddPCR)</b>   | TCCATCAGGAAATTTTTGG<br>TGTGCTATGTTTTGAAGCA<br>CTTGGAGAGATTTGTTTACACATGTGTAGG                               | 95°C 10', (95°C 30'', 58°C 30'') x45 & 98°C 10'           |
| <b>10-C7D2N (Nested)</b>  | AAGTTTTGTTGGCTTCGAGA<br>CAATACAGGAGCACCCAGAT                                                               | 95°C 15', (95°C 30'', 58°C 30'', 72°C 45'') x12 & 72°C 5' |
| <b>10-C7D2d (ddPCR)</b>   | CCAGAATCTCCAGAGCCA<br>CCACACATTAATAATGGGAGACT<br>CTCCATTCCTTTAGAACCACTACAGTGGG                             | 95°C 10', (95°C 30'', 58°C 30'') x45 & 98°C 10'           |
| <b>10-C9D1N (Nested)</b>  | CCATGTTTACACCACGGAAC<br>AGAAACCGGTTGGAGGTAAC                                                               | 95°C 15', (95°C 30'', 58°C 30'', 72°C 45'') x12 & 72°C 5' |
| <b>10-C9D1d (ddPCR)</b>   | TCAATGCTCCACTATTGGTAAA<br>CGGTTGGAGGTAACGAATC<br>CTATTTCTAAGTGAACATCAGGAGAAC                               | 95°C 10', (95°C 30'', 58°C 30'') x45 & 98°C 10'           |
| <b>15-C12D1 (ddPCR)</b>   | TCTATGTTTCAGAGAGGCTGATTT<br>AGCAAATAAGCTGTCACTGTTGAG<br>AGCCACCTGCCTGGGGTCTTCA                             | 95°C 10', (95°C 30'', 59°C 30'') x45 & 98°C 10'           |
| <b>15-C12I2 (ddPCR)</b>   | GGTTGACCTGTTGTCCAAGT<br>AAGGCATCTAACAGGAAAAGA<br>AGAACATTCGTCCCTTCTCTCTCC                                  | 95°C 10', (95°C 30'', 59°C 30'') x45 & 98°C 10'           |
| <b>16-C6D3N (Nested)</b>  | AGGCTAAAACCTTTGGAATTTTCT<br>TTCTTCCAATGTTAAATCTTGC                                                         | 95°C 15', (95°C 30'', 58°C 30'', 72°C 45'') x12 & 72°C 5' |
| <b>16-C6D3d (ddPCR)</b>   | GAGTCCCTTTTGATCACACC<br>GCCAGAAAATTCATCCAGTT<br>AATTATTGGATTTGCTTGGGAAGAGTGG                               | 95°C 10', (95°C 30'', 58°C 30'') x45 & 98°C 10'           |
| <b>16-C14D1N (Nested)</b> | AAACCCCTTTTCTCCATGAC<br>TGCATAGAAAGTTTGATTGCTT                                                             | 95°C 15', (95°C 30'', 58°C 30'', 72°C 45'') x12 & 72°C 5' |
| <b>16-C14D1d (ddPCR)</b>  | CCTTTTCTCCATGACCTTTG<br>TCATGAGTTCCATTGATTGC<br>CACAGTATTCTCTATTGCAGTGGTGCT                                | 95°C 10', (95°C 30'', 58°C 30'') x45 & 98°C 10'           |
| <b>16-C16D1N (Nested)</b> | AGAGGCTGATCAAAGGGAAT<br>CCCCTGAGATGATTTTTGC                                                                | 95°C 15', (95°C 30'', 58°C 30'', 72°C 45'') x12 & 72°C 5' |
| <b>16-C16D1d (ddPCR)</b>  | GGGATTGCAGGACTCTTTC<br>GAATGATCACAGCCTTCAAA<br>AGGGGAAGGAGGCAGAGTGCTTA                                     | 95°C 10', (95°C 30'', 58°C 30'') x45 & 98°C 10'           |
| <b>18-C3D1d (ddPCR)</b>   | CTGCTTTACACTCAGTTGATCTGT<br>GAGTCACCAGAGACCTTGTACA<br>TTCCCTGCCTAGCCTTGCCT                                 | 95°C 10', (95°C 30'', 59°C 30'') x45 & 98°C 10'           |
| <b>18-C16D1d (ddPCR)</b>  | CCTCGCTCAAGAAGTCTGT<br>TTCCCTGAAACTCCCACAACA<br>TCCTACGGGGAGAGACTCAATGC                                    | 95°C 10', (95°C 30'', 59°C 30'') x45 & 98°C 10'           |
| <b>18-C16D2d (ddPCR)</b>  | ATGGAATGCTGTATTTCATACATCTGA<br>TTACTTTGGGGCTCATGGACTTG<br>CCAGATGTGGATACCCTGGAAAGTGG                       | 95°C 10', (95°C 30'', 59°C 30'') x45 & 98°C 10'           |
| <b>18-C16D3d (ddPCR)</b>  | ACTGTACCAAGCAACTACATT<br>ATTCAAACAGACTGAGTGTGAC<br>ATGCCTAAGACTTTAAGAGGAAAAGCT                             | 95°C 10', (95°C 30'', 59°C 30'') x45 & 98°C 10'           |
| <b>18-C20D1d (ddPCR)</b>  | ACAACCCAGGAATTAGAAGG<br>TCTGTGAGTCTGGTTAGCACAA<br>AAGACGGCATGAGTGAAGTCCCT                                  | 95°C 10', (95°C 30'', 59°C 30'') x45 & 98°C 10'           |
| <b>18-C20D2d (ddPCR)</b>  | TTCATTACCCTGAGCTTTGGTT<br>TCTTCAGAGATCCCCCTTCC<br>TAATCTGGGCAGCCTCCAGTTCACA                                | 95°C 10', (95°C 30'', 59°C 30'') x45 & 98°C 10'           |
| <b>19-C5D1 (ddPCR)</b>    | CAGAAGGAATCATAATCAATTTCTA<br>CAAAGTGATATCCTCAAACAGCTA<br>TGAAAGGAAGTCTAGCTTAATCATT<br>ACCTTGGGCAAGAGAGGTTA | 95°C 10', (95°C 30'', 59°C 30'') x45 & 98°C 10'           |

|                               |                                                                                 |                                               |
|-------------------------------|---------------------------------------------------------------------------------|-----------------------------------------------|
| <b>19-C8I1 (ddPCR)</b>        | AAAATAGGTCATCAAAAGGAAAAA<br>CACTGAATCTTTGTGGCCTCACC                             | 95°C 10", (95°C 30", 59°C 30") x45 & 98°C 10" |
| <b>19-C12D1 (ddPCR)</b>       | TGTGCTCCAAATCAAATGC<br>GTCATTGCCACTGGTCTCCT<br>TCCAGATCACTAGCTCTGAACATTGA       | 95°C 10", (95°C 30", 59°C 30") x45 & 98°C 10" |
| <b>19-C12D2 (ddPCR)</b>       | ACTGATACTGGTTAAGAGGATCTTG<br>TTCCATTTTAATGGGAACAATG<br>TCCCAAATGGAATCTATAAAGGGA | 95°C 10", (95°C 30", 59°C 30") x45 & 98°C 10" |
| <b>19-C13T(13:8)1 (ddPCR)</b> | GGCAATTTCCCCTGTATCC<br>AATAGTGTCTCTGGGGATGA<br>TGAGAATTAATAATGACCTTCTCCA        | 95°C 10", (95°C 30", 59°C 30") x45 & 98°C 10" |
| <b>19-C13T(13:8)2 (ddPCR)</b> | TTACAACCATTGTTGAGGGTCT<br>TTGTTCAAGCCAATGTGTTTTTC<br>CTGTCCAGGGAATAATAATGTTTGA  | 95°C 10", (95°C 30", 59°C 30") x45 & 98°C 10" |

1Pallisaard N AR, Spindler KG, Jakobsen A. European Journal of Cancer. Vol 49:suppl.4, Abstract MC13-088, 2013.



**Supplementary Table 4.** Somatic rearrangements identified by pipeline 1 and 2.

| Pt. | Pipeline | Chr. | Location 1 (Hg19) | Chr. | Location 2 (Hg19) | Size(bp)   | Class | Reads | Amplitude (SNP) <sup>#</sup> | Validated by Sanger sequencing | Plasma SSV analysis by ddPCR | Preserved from tumor to metastases |
|-----|----------|------|-------------------|------|-------------------|------------|-------|-------|------------------------------|--------------------------------|------------------------------|------------------------------------|
| 1   | 1        | 1    | 21,800,307        | 1    | 64,580,322        | 42,780,015 | INV   | 4     | -0.462                       | C1I1                           | Negative                     | N/A**                              |
| 1   | 1        | 2    | 190,380,577       | 2    | 190,403,932       | 23,355     | DEL   | 5     | -0.345                       | C2D1                           | Negative                     | N/A                                |
| 1   | 1        | 4    | 99,212,690        | 4    | 99,282,549        | 69,859     | DEL   | 2     | -1.338                       |                                | ND*                          | N/A                                |
| 1   | 1        | 5    | 59,509,055        | 5    | 59,643,263        | 134,208    | DEL   | 2     | -0.403                       |                                | ND                           | N/A                                |
| 1   | 1        | 7    | 90,068,750        | 7    | 90,270,995        | 202,245    | DEL   | 4     | -0.559                       |                                | ND                           | N/A                                |
| 1   | 1        | 11   | 84,971,740        | 11   | 85,313,110        | 341,370    | DEL   | 3     | -0.352                       | C11D1                          | Negative                     | N/A                                |
| 1   | 1        | 16   | 6,344,378         | 16   | 6,940,220         | 595,842    | DEL   | 4     | -0.523                       | C16D3                          | Negative                     | N/A                                |
| 1   | 1        | 16   | 6,459,598         | 16   | 7,211,090         | 751,492    | DEL   | 4     | -1.165                       |                                | ND                           | N/A                                |
| 1   | 1        | 16   | 7,418,474         | 16   | 7,496,667         | 78,193     | DEL   | 3     | -0.536                       | C16D1                          | Negative                     | N/A                                |
| 1   | 1        | 18   | 57,549,267        | 18   | 57,639,302        | 90,035     | DEL   | 3     | -1.096                       |                                | ND                           | N/A                                |
| 1   | 1        | 20   | 14,719,275        | 20   | 15,258,734        | 539,459    | DEL   | 4     | -0.405                       |                                | ND                           | N/A                                |
| 1   | 1        | 20   | 14,922,380        | 20   | 15,022,536        | 100,156    | DEL   | 3     | -0.42                        |                                | ND                           | N/A                                |
| 1   | 1        | 20   | 14,969,501        | 20   | 15,195,944        | 226,443    | DEL   | 2     | -0.405                       |                                | ND                           | N/A                                |
| 2   | 1        | 1    | 192,775,425       | 1    | 192,821,726       | 46,301     | DEL   | 5     | -1.04                        | C1D1                           | Negative                     | N/A                                |
| 2   | 1        | 3    | 60,138,611        | 3    | 60,196,513        | 57,902     | DEL   | 4     | -0.44                        | C3D1                           | Negative                     | N/A                                |
| 2   | 1        | 3    | 60,290,731        | 3    | 60,393,493        | 102,762    | DEL   | 9     | -0.49                        | C3D2                           | ND                           | N/A                                |
| 2   | 1        | 3    | 60,484,029        | 3    | 60,661,659        | 177,630    | DEL   | 7     | -0.48                        |                                | ND                           | N/A                                |
| 2   | 1        | 3    | 174,764,067       | 3    | 174,865,023       | 100,956    | DEL   | 7     | -0.86                        | C3D3                           | ND                           | N/A                                |
| 2   | 1        | 3    | 174,865,300       | 3    | 174,976,187       | 110,887    | DEL   | 7     | -0.36                        |                                | ND                           | N/A                                |
| 2   | 1        | 4    | 91,766,206        | 4    | 91,818,287        | 52,081     | DEL   | 7     | -0.34                        |                                | ND                           | N/A                                |
| 2   | 1        | 4    | 93,177,692        | 4    | 93,330,435        | 152,743    | DEL   | 4     | -0.37                        |                                | ND                           | N/A                                |
| 2   | 1        | 4    | 93,400,494        | 4    | 93,916,277        | 515,783    | DEL   | 6     | -0.30                        |                                | ND                           | N/A                                |
| 2   | 1        | 4    | 93,586,033        | 4    | 93,698,710        | 112,677    | DEL   | 4     | -0.96                        |                                | ND                           | N/A                                |
| 2   | 1        | 4    | 106,175,087       | 4    | 106,525,867       | 350,780    | DEL   | 11    | -0.37                        | C4D1                           | Positive                     | N/A                                |
| 2   | 1        | 6    | 19,185,392        | 6    | 40,968,849        | 21,783,457 | INV   | 8     | -0.42                        |                                | ND                           | N/A                                |
| 2   | 1        | 6    | 91,712,449        | 6    | 91,856,061        | 143,612    | DEL   | 6     | -0.4                         |                                | ND                           | N/A                                |
| 2   | 1        | 6    | 163,050,354       | 6    | 163,162,927       | 112,573    | DEL   | 6     | -0.92                        |                                | ND                           | N/A                                |
| 2   | 1        | 7    | 145,992,207       | 7    | 146,306,320       | 314,113    | DEL   | 5     | -0.4                         |                                | ND                           | N/A                                |
| 2   | 1        | 7    | 146,323,715       | 7    | 146,395,251       | 71,536     | DEL   | 3     | -0.397                       | C7D1                           | ND                           | N/A                                |
| 2   | 1        | 7    | 146,407,661       | 7    | 146,618,400       | 210,739    | DEL   | 5     | -0.855                       |                                | ND                           | N/A                                |
| 2   | 1        | 7    | 146,504,749       | 7    | 146,691,204       | 186,455    | DEL   | 3     | -0.414                       |                                | ND                           | N/A                                |

|   |   |    |             |    |             |            |     |    |        |         |          |     |
|---|---|----|-------------|----|-------------|------------|-----|----|--------|---------|----------|-----|
| 2 | 1 | 7  | 146,852,920 | 7  | 146,945,474 | 92,554     | DEL | 4  | -0.987 |         | ND       | N/A |
| 2 | 1 | 7  | 147,057,615 | 7  | 147,206,451 | 148,836    | DEL | 7  | -0.469 |         | ND       | N/A |
| 2 | 1 | 11 | 80,646,575  | 11 | 80,977,206  | 330,631    | DEL | 3  | -0.4   | C11D1   | Negative | N/A |
| 2 | 1 | 13 | 27,530,543  | 13 | 27,537,906  | 7,363      | ITX | 91 | 1.238  | C13ITX2 | Positive | N/A |
| 2 | 1 | 20 | 14,808,980  | 20 | 14,848,561  | 39,581     | DEL | 2  | -0.384 |         | ND       | N/A |
| 2 | 1 | 20 | 14,821,503  | 20 | 15,172,003  | 350,500    | DEL | 3  | -0.6   |         | ND       | N/A |
| 2 | 1 | 20 | 14,966,177  | 20 | 15,201,351  | 235,174    | DEL | 2  | -0.3   |         | ND       | N/A |
| 4 | 1 | 1  | 106,503,709 | 1  | 118,449,060 | 11,945,351 | DEL | 4  | -0.127 | C1D1    | Positive | N/A |
| 4 | 1 | 2  | 110,109,317 | 2  | 110,251,577 | 142,260    | DEL | 5  | -0.339 |         | ND       | N/A |
| 4 | 1 | 2  | 110,874,389 | 2  | 111,037,146 | 162,757    | DEL | 5  | -0.339 |         | ND       | N/A |
| 4 | 1 | 2  | 114,553,679 | 2  | 114,619,945 | 66,266     | DEL | 3  | -0.246 |         | ND       | N/A |
| 4 | 1 | 2  | 118,051,890 | 2  | 122,662,329 | 4,610,439  | DEL | 5  | -0.378 |         | ND       | N/A |
| 4 | 1 | 2  | 136,631,841 | 2  | 137,959,724 | 1,327,883  | DEL | 2  | -0.163 | C2D2    | ND       | N/A |
| 4 | 1 | 2  | 143,775,511 | 2  | 149,312,728 | 5,537,217  | DEL | 2  | -0.374 | C2D1    | Positive | N/A |
| 4 | 1 | 5  | 146,440,990 | 5  | 146,878,844 | 437,854    | DEL | 2  | -0.269 |         | ND       | N/A |
| 4 | 1 | 6  | 381,150     | 6  | 625,549     | 244,399    | DEL | 3  | -0.289 |         | ND       | N/A |
| 4 | 1 | 6  | 1,128,938   | 6  | 2,163,475   | 1,034,537  | DEL | 3  | -0.33  |         | ND       | N/A |
| 4 | 1 | 6  | 2,237,480   | 6  | 5,325,143   | 3,087,663  | DEL | 2  | -0.318 |         | ND       | N/A |
| 4 | 1 | 6  | 5,587,549   | 6  | 5,925,022   | 337,473    | DEL | 2  | -0.354 |         | ND       | N/A |
| 4 | 1 | 6  | 6,882,525   | 6  | 9,158,626   | 2,276,101  | DEL | 2  | -0.342 |         | ND       | N/A |
| 4 | 1 | 6  | 20,781,286  | 6  | 20,901,416  | 120,130    | DEL | 2  | -0.357 |         | ND       | N/A |
| 4 | 1 | 6  | 21,010,568  | 6  | 21,347,173  | 336,605    | DEL | 2  | -0.308 |         | ND       | N/A |
| 4 | 1 | 6  | 21,421,445  | 6  | 21,462,849  | 41,404     | DEL | 1  | -0.378 |         | ND       | N/A |
| 4 | 1 | 6  | 22,015,481  | 6  | 22,074,193  | 58,712     | DEL | 2  | -0.322 |         | ND       | N/A |
| 4 | 1 | 6  | 65,846,617  | 6  | 65,876,997  | 30,380     | DEL | 1  | -0.253 |         | ND       | N/A |
| 4 | 1 | 7  | 147,155,588 | 7  | 147,805,585 | 649,997    | DEL | 2  | -0.122 | C7D1    | Positive | N/A |
| 4 | 1 | 8  | 60,726,644  | 8  | 82,048,061  | 21,321,417 | AMP | 3  | 0.237  |         | ND       | N/A |
| 4 | 1 | 8  | 90,312,120  | 8  | 91,641,447  | 1,329,327  | AMP | 4  | 0.246  |         | ND       | N/A |
| 4 | 1 | 10 | 134,652,722 | 10 | 135,252,996 | 600,274    | DEL | 1  | -0.355 |         | ND       | N/A |
| 4 | 1 | 10 | 28,421,452  | 10 | 28,870,756  | 449,304    | DEL | 2  | -0.277 | C10D1   | Positive | N/A |
| 4 | 1 | 14 | 95,780,574  | 14 | 96,734,831  | 954,257    | DEL | 2  | -0.388 |         | ND       | N/A |
| 4 | 1 | 14 | 96,736,016  | 14 | 96,797,473  | 61,457     | DEL | 2  | -0.282 |         | ND       | N/A |
| 4 | 1 | 14 | 96,980,052  | 14 | 97,124,096  | 144,044    | DEL | 4  | -0.318 |         | ND       | N/A |
| 4 | 1 | 14 | 97,151,378  | 14 | 97,226,233  | 74,855     | DEL | 1  | -0.443 |         | ND       | N/A |
| 4 | 1 | 16 | 6,653,132   | 16 | 6,752,046   | 98,914     | DEL | 2  | -0.145 | C16D1   | ND       | N/A |

|    |     |    |             |    |             |            |     |   |        |         |          |     |
|----|-----|----|-------------|----|-------------|------------|-----|---|--------|---------|----------|-----|
| 4  | 1   | 17 | 11,590,136  | 17 | 11,997,692  | 407,556    | DEL | 1 | -0.683 |         | ND       | N/A |
| 4  | 1   | 18 | 2,763,210   | 18 | 4,038,123   | 1,274,913  | DEL | 2 | -0.404 | C18D1   | ND       | N/A |
| 5  | 2   | 1  | 26,213,965  | 1  | 26,579,546  | 364,025    | DEL | 2 |        | C1D1    | ND       | N/A |
| 5  | 2   | 1  | 36,670,445  | 1  | 55,589,198  | 18,917,576 | DEL | 2 |        | C1D2    | Negative | N/A |
| 5  | 2   | 1  | 55,429,415  | 1  | 59,046,906  | 3,616,905  | INV | 2 |        | C1I1    | Negative | N/A |
| 5  | 2   | 5  | 119,499,524 | 5  | 119,549,363 | 52,620     | DEL | 3 |        | C5D1    | Negative | N/A |
| 5  | 2   | 12 | 86,881,455  | 12 | 86,970,252  | 91,383     | DEL | 2 |        | C12D1   | Negative | N/A |
| 6  | 1   | 10 | 5,382,443   | 10 | 5,782,602   | 400,159    | ITX | 3 | 0.208  | C10ITX  | Positive | N/A |
| 6  | 1   | 20 | 14,677,101  | 20 | 15,070,699  | 393,598    | DEL | 3 | -0.125 | C20D2   | Negative | N/A |
| 6  | 1   | 20 | 29,809,848  | 20 | 54,457,627  | 24,647,779 | DEL | 2 | 0.312  |         | ND       | N/A |
| 6  | 1   | 20 | 30,326,644  | 20 | 47,981,511  | 17,654,867 | ITX | 2 | 0.493  |         | ND       | N/A |
| 6  | 1   | 20 | 39,815,996  | 20 | 57,603,751  | 17,787,755 | ITX | 4 | 0.432  |         | ND       | N/A |
| 6  | 1   | 20 | 42,817,826  | 20 | 61,090,236  | 18,272,410 | DEL | 4 | 0.656  | C20D3   | Positive | N/A |
| 6  | 1   | 20 | 42,828,701  | 20 | 56,544,922  | 13,716,221 | ITX | 7 | 0.656  |         | ND       | N/A |
| 6  | 1   | 20 | 48,277,025  | 20 | 61,058,932  | 12,781,907 | INV | 2 | 0.39   |         | ND       | N/A |
| 6  | 1   | 20 | 51,106,900  | 20 | 61,090,236  | 9,983,336  | INV | 5 | 0.473  | C20I1   | Positive | N/A |
| 6  | 1   | 20 | 51,590,161  | 20 | 60,118,999  | 8,528,838  | ITX | 7 | 0.355  | C20ITX1 | ND       | N/A |
| 6  | 1   | 20 | 52,281,876  | 20 | 61,003,433  | 8,721,557  | DEL | 2 | 0.57   |         | ND       | N/A |
| 6  | 1   | 20 | 56,557,247  | 20 | 61,058,932  | 4,501,685  | INV | 4 | 0.358  |         | ND       | N/A |
| 6  | 1   | 20 | 60,114,377  | 20 | 61,049,656  | 935,279    | INV | 3 | 0.357  |         | ND       | N/A |
| 8  | 1   | 7  | 11,555,334  | 7  | 12,509,227  | 953,893    | DEL | 7 | -0.299 | C7D1    | Positive | N/A |
| 8  | 2   | 1  | 245,427,132 | 1  | 245,614,918 | 187,786    | DEL | 2 |        |         | ND       | N/A |
| 8  | 2   | 10 | 5,618,677   | 10 | 5,642,936   | 24,259     | ITX | 5 |        |         | ND       | N/A |
| 8  | 2   | 10 | 27,378,773  | 10 | 75,270,851  | 47,892,078 | ITX | 2 |        |         | ND       | N/A |
| 8  | 2   | 15 | 75,624,637  | 15 | 78,238,153  | 2,613,516  | INV | 2 |        |         | ND       | N/A |
| 8  | 2   | 16 | 5,436,326   | 16 | 5,906,076   | 469,750    | DEL | 3 |        |         | ND       | N/A |
| 8  | 1+2 | 1  | 5,686,842   | 1  | 37,310,730  | 31,623,888 | DEL | 3 | -0.213 | C1D1    | Positive | N/A |
| 8  | 1+2 | 3  | 59,848,514  | 3  | 60,212,346  | 363,832    | DEL | 3 | -0.294 | C3D1    | Negative | N/A |
| 8  | 1+2 | 15 | 80,743,250  | 15 | 86,355,604  | 5,612,354  | DEL | 5 | -0.216 | C15D1   | Negative | N/A |
| 8  | 1+2 | 15 | 81,234,423  | 15 | 86,360,900  | 5,126,477  | ITX | 3 | -0.218 |         | ND       | N/A |
| 8  | 1+2 | 15 | 85,094,942  | 15 | 90,579,064  | 5,484,122  | INV | 2 | -0.216 |         | ND       | N/A |
| 8  | 1+2 | 16 | 6,298,171   | 16 | 6,455,087   | 156,916    | DEL | 3 | -0.301 | C16D1   | ND       | N/A |
| 8  | 1+2 | 16 | 6,457,503   | 16 | 6,889,515   | 432,012    | DEL | 6 | -0.301 | C16D2   | Negative | N/A |
| 8  | 2   | 16 | 5,436,326   | 16 | 5,906,076   | 469,750    | DEL | 3 |        | C16D3   | ND       | N/A |
| 10 | 1   | 7  | 144,859,153 | 7  | 145,710,629 | 851,476    | DEL | 1 | -0.523 | C7D2    | Positive | N/A |

|    |     |    |             |    |             |             |     |    |        |       |          |     |
|----|-----|----|-------------|----|-------------|-------------|-----|----|--------|-------|----------|-----|
| 10 | 2   | 2  | 241,552,388 | 2  | 241,809,817 | 257,429     | DEL | 4  |        |       | ND       | N/A |
| 10 | 2   | 3  | 44,347,960  | 3  | 44,370,945  | 22,985      | DEL | 11 |        | C3D1  | Positive | N/A |
| 10 | 2   | 5  | 146,024,823 | 5  | 146,065,960 | 41,137      | DEL | 2  |        |       | ND       | N/A |
| 10 | 2   | 6  | 6,147,180   | 6  | 6,851,738   | 704,558     | DEL | 3  |        |       | ND       | N/A |
| 10 | 2   | 7  | 63,319,538  | 7  | 73,874,442  | 10,554,904  | DEL | 3  |        | C7D1  | ND       | N/A |
| 10 | 2   | 8  | 60,013,119  | 8  | 61,680,052  | 1,666,933   | INV | 11 |        |       | ND       | N/A |
| 10 | 2   | 8  | 60,013,119  | 8  | 61,689,902  | 1,676,783   | INV | 9  |        |       | ND       | N/A |
| 10 | 2   | 16 | 70,155,648  | 16 | 74,394,148  | 4,238,500   | INV | 2  |        |       | ND       | N/A |
| 10 | 1+2 | 1  | 6,225,150   | 1  | 36,045,932  | 29,820,782  | DEL | 4  | -0.49  |       | ND       | N/A |
| 10 | 1+2 | 3  | 99,995,570  | 3  | 118,411,438 | 18,415,868  | INV | 2  | 0.228  |       | ND       | N/A |
| 10 | 1+2 | 3  | 99,995,570  | 3  | 118,414,770 | 18,419,200  | DEL | 4  | 0.228  |       | ND       | N/A |
| 10 | 1+2 | 4  | 171,659,948 | 4  | 174,060,373 | 2,400,425   | DEL | 2  | -0.49  |       | ND       | N/A |
| 10 | 1+2 | 6  | 114,209,636 | 6  | 114,274,860 | 65,224      | DEL | 3  | -1.195 | C6D1  | Negative | N/A |
| 10 | 1+2 | 9  | 90,381,766  | 9  | 91,411,294  | 1,029,528   | DEL | 5  | -0.509 | C9D1  | Positive | N/A |
| 15 | 1   | 5  | 159,084,546 | 5  | 159,320,294 | 235,748     | ITX | 3  | 0.33   |       | ND       | N/A |
| 15 | 1   | 11 | 56,624,833  | 11 | 65,908,165  | 9,283,332   | DEL | 7  | -0.265 |       | ND       | N/A |
| 15 | 1   | 11 | 66,442,472  | 19 | 35,440,503  | -31,001,969 | CTX | 4  | -0.304 |       | ND       | N/A |
| 15 | 1   | 12 | 2,581,688   | 12 | 3,521,403   | 939,715     | DEL | 26 | -0.359 | C12D2 | ND       | N/A |
| 15 | 1   | 12 | 2,741,301   | 12 | 15,090,194  | 12,348,893  | INV | 6  | -0.285 | C12I2 | Positive | N/A |
| 15 | 1   | 12 | 3,526,678   | 12 | 4,973,443   | 1,448,586   | DEL | 20 | 0.997  | C12D1 | Positive | N/A |
| 15 | 1   | 12 | 4,055,544   | 12 | 14,759,164  | 10,703,620  | INV | 30 | 0.938  | C12I1 | ND       | N/A |
| 15 | 1   | 14 | 31,727,802  | 14 | 32,312,933  | 585,131     | DEL | 5  | -0.283 | C14D1 | ND       | N/A |
| 15 | 1   | 15 | 89,850,225  | 15 | 90,165,845  | 315,620     | ITX | 3  | 0.387  |       | ND       | N/A |
| 15 | 1   | 17 | 28,555,679  | 17 | 34,456,119  | 5,900,440   | DEL | 7  | -0.274 |       | ND       | N/A |
| 15 | 1   | 17 | 34,257,406  | 17 | 34,935,790  | 678,384     | INV | 6  | 0.757  |       | ND       | N/A |
| 15 | 1   | 17 | 39,314,104  | 17 | 40,333,669  | 1,019,565   | INV | 3  | -0.274 |       | ND       | N/A |
| 16 | 1   | 14 | 42,004,790  | 14 | 49,754,826  | 7,750,036   | DEL | 1  | -0.271 | C14D1 | Positive | N/A |
| 16 | 1   | 16 | 7,035,042   | 16 | 7,146,431   | 111,389     | DEL | 1  | -0.272 |       | ND       | N/A |
| 16 | 2   | 1  | 77,695,769  | 1  | 77,794,867  | 99,098      | DEL | 2  |        |       | ND       | N/A |
| 16 | 2   | 1  | 95,130,572  | 1  | 95,314,672  | 184,100     | DEL | 3  |        |       | ND       | N/A |
| 16 | 2   | 4  | 26,324,727  | 4  | 168,420,548 | 142,095,821 | INV | 2  |        |       | ND       | N/A |
| 16 | 2   | 6  | 121,461,719 | 6  | 121,630,100 | 168,381     | DEL | 4  |        | C6D1  | ND       | N/A |
| 16 | 2   | 6  | 5,081,051   | 6  | 5,523,350   | 442,299     | DEL | 2  |        | C6D3  | Positive | N/A |
| 16 | 2   | 9  | 136,182,707 | 9  | 138,410,139 | 2,227,432   | DEL | 2  |        |       | ND       | N/A |
| 16 | 2   | 10 | 77,628,406  | 10 | 77,665,811  | 37,405      | DEL | 2  |        |       | ND       | N/A |

|    |     |    |             |    |             |             |     |    |        |             |          |                   |
|----|-----|----|-------------|----|-------------|-------------|-----|----|--------|-------------|----------|-------------------|
| 16 | 2   | 12 | 100,433,893 | 12 | 100,607,683 | 173,790     | DEL | 2  |        |             | ND       | N/A               |
| 16 | 2   | 14 | 53,904,951  | 14 | 54,129,135  | 224,184     | DEL | 2  |        |             | ND       | N/A               |
| 16 | 2   | 15 | 64,964,884  | 15 | 67,197,464  | 2,232,580   | INV | 5  |        |             | ND       | N/A               |
| 16 | 2   | 15 | 67,193,914  | 15 | 67,632,363  | 438,449     | INV | 2  |        |             | ND       | N/A               |
| 16 | 2   | 20 | 34,263,207  | 20 | 34,290,057  | 26,850      | ITX | 2  |        |             | ND       | N/A               |
| 16 | 1+2 | 16 | 6,372,175   | 16 | 6,685,322   | 313,147     | DEL | 2  | -0.271 |             | ND       | N/A               |
| 16 | 1+2 | 16 | 6,688,080   | 16 | 7,034,941   | 346,861     | DEL | 2  | -0.599 | C16D1       | Positive | N/A               |
| 18 | 1   | 20 | 15,013,498  | 20 | 15,146,115  | 130,521     | DEL | 1  | -0.31  |             | ND       | No                |
| 18 | 2   | 3  | 49,444,117  | 12 | 86,120,327  | N/A         | CTX | 2  |        |             | ND       | No                |
| 18 | 2   | 3  | 59,811,840  | 3  | 59,905,790  | 93,950      | DEL | 2  |        |             | ND       | No                |
| 18 | 2   | 3  | 175,396,006 | 10 | 80,566,192  | N/A         | CTX | 5  |        |             | ND       | Yes               |
| 18 | 2   | 7  | 110,429,796 | 7  | 110,481,092 | 51,296      | DEL | 3  |        |             | ND       | No                |
| 18 | 2   | 11 | 61,841,732  | 14 | 81,786,446  | N/A         | CTX | 2  |        |             | ND       | Yes               |
| 18 | 2   | 16 | 47,991,864  | 16 | 69,162,992  | 21,171,128  | ITX | 2  |        |             | ND       | No                |
| 18 | 2   | 16 | 85,204,195  | 16 | 86,503,113  | 1,298,918   | INV | 4  |        |             | ND       | Yes               |
| 18 | 2   | 17 | 37,792,424  | 17 | 39,773,331  | 1,980,907   | ITX | 2  |        |             | ND       | No                |
| 18 | 2   | 20 | 29,535,048  | 20 | 30,535,784  | 1,000,736   | DEL | 2  |        |             | ND       | No                |
| 18 | 2   | 20 | 32,257,728  | 20 | 32,503,263  | 245,535     | DEL | 2  |        |             | ND       | No                |
| 18 | 2   | 21 | 30,486,042  | 21 | 30,546,052  | 60,010      | ITX | 4  |        |             | ND       | No                |
| 18 | 1+2 | 3  | 25,788,478  | 3  | 29,942,146  | 4,153,668   | DEL | 2  | -0.241 | C3D1        | Negative | No                |
| 18 | 1+2 | 9  | 4,376,242   | 9  | 7,805,854   | 3,429,612   | INV | 4  | -0.743 |             | ND       | Yes               |
| 18 | 1+2 | 9  | 4,789,944   | 9  | 9,665,095   | 4,875,151   | INV | 6  | -0.804 |             | ND       | Yes               |
| 18 | 1+2 | 16 | 6,719,893   | 16 | 6,802,435   | 82,542      | DEL | 3  | -0.22  | C16D1       | Negative | No                |
| 18 | 1+2 | 16 | 6,786,299   | 16 | 6,942,699   | 156,400     | DEL | 6  | -0.201 | C16D2       | Positive | Yes <sup>\$</sup> |
| 18 | 1+2 | 16 | 6,806,586   | 16 | 6,865,912   | 59,326      | DEL | 3  | -0.894 | C16D3       | Negative | No                |
| 18 | 1+2 | 20 | 14,842,321  | 20 | 15,326,591  | 484,270     | DEL | 3  | -0.802 | C20D1       | Positive | Yes               |
| 18 | 1+2 | 20 | 15,254,358  | 20 | 15,363,390  | 109,032     | DEL | 4  | -1.27  | C20D2       | Positive | Yes               |
| 19 | 1   | 5  | 93,036,151  | 5  | 116,904,266 | 23,868,115  | DEL | 7  | -0.308 | C5D1        | Negative | ND                |
| 19 | 1   | 8  | 39,232,907  | 8  | 39,387,407  | 154,500     | DEL | 5  | 0.39   |             | ND       | ND                |
| 19 | 1   | 8  | 115,867,302 | 13 | 82,256,869  | -33,610,433 | CTX | 10 | 0.353  | C13T(13:8)2 | Positive | ND                |
| 19 | 1   | 8  | 124,152,277 | 13 | 83,045,953  | -41,106,324 | CTX | 13 | 0.629  | C13T(13:8)1 | Negative | ND                |
| 19 | 1   | 8  | 136,659,089 | 8  | 137,983,171 | 1,324,082   | INV | 14 | 0.361  | C8I1        | Negative | ND                |
| 19 | 1   | 12 | 750,451     | 12 | 1,673,364   | 922,913     | DEL | 26 | 0.308  | C12D1       | Positive | ND                |
| 19 | 1   | 12 | 750,451     | 12 | 1,673,364   | 922,913     | DEL | 26 | 0.308  | C12D2       | Positive | ND                |
| 24 | 2   | 1  | 168,188,764 | 1  | 182,274,074 | 14,085,310  | INV | 3  |        |             | N/A**    | Yes               |

|    |   |    |             |    |             |            |     |    |     |     |
|----|---|----|-------------|----|-------------|------------|-----|----|-----|-----|
| 24 | 2 | 3  | 193,862,627 | 3  | 193,985,240 | 122,613    | ITX | 2  | N/A | Yes |
| 24 | 2 | 4  | 13,648,443  | 4  | 15,503,473  | 1,855,030  | DEL | 3  | N/A | Yes |
| 24 | 2 | 8  | 28,435,150  | 17 | 79,759,475  | N/A        | CTX | 3  | N/A | Yes |
| 24 | 2 | 9  | 130,557,710 | 9  | 130,714,806 | 157,096    | DEL | 3  | N/A | No  |
| 24 | 2 | 13 | 86,973,917  | 13 | 87,951,805  | 977,888    | INV | 6  | N/A | Yes |
| 24 | 2 | 16 | 6,621,165   | 16 | 6,672,258   | 51,093     | DEL | 2  | N/A | Yes |
| 24 | 2 | 17 | 19,427,192  | 17 | 19,790,533  | 363,341    | INV | 2  | N/A | Yes |
| 24 | 2 | 17 | 21,074,252  | 17 | 21,292,903  | 218,651    | DEL | 3  | N/A | Yes |
| 24 | 2 | 20 | 14,850,153  | 20 | 15,072,373  | 222,220    | DEL | 2  | N/A | Yes |
| 24 | 2 | 23 | 41,184,610  | 23 | 78,676,440  | 37,491,830 | INV | 4  | N/A | Yes |
| 28 | 2 | 1  | 241,431,223 | 1  | 242,359,929 | 928,706    | ITX | 2  | N/A | Yes |
| 28 | 2 | 2  | 98,384,391  | 2  | 99,501,960  | 1,117,569  | DEL | 3  | N/A | Yes |
| 28 | 2 | 4  | 170,281,585 | 14 | 52,664,801  | N/A        | CTX | 2  | N/A | Yes |
| 28 | 2 | 4  | 91,139,559  | 4  | 92,139,761  | 1,000,202  | DEL | 4  | N/A | No  |
| 28 | 2 | 5  | 112,175,701 | 5  | 112,240,950 | 65,249     | DEL | 3  | N/A | Yes |
| 28 | 2 | 6  | 77,436,862  | 6  | 77,461,604  | 24,742     | DEL | 2  | N/A | Yes |
| 28 | 2 | 6  | 157,610,787 | 6  | 157,691,692 | 80,905     | INV | 3  | N/A | Yes |
| 28 | 2 | 8  | 39,433,540  | 8  | 39,645,931  | 212,391    | INV | 2  | N/A | Yes |
| 28 | 2 | 8  | 41,101,130  | 8  | 94,940,312  | 53,839,182 | ITX | 2  | N/A | Yes |
| 28 | 2 | 8  | 39,890,169  | 8  | 42,153,400  | 2,263,231  | INV | 3  | N/A | Yes |
| 28 | 2 | 8  | 39,903,411  | 8  | 42,119,649  | 2,216,238  | INV | 3  | N/A | Yes |
| 28 | 2 | 8  | 90,065,770  | 8  | 94,299,420  | 4,233,650  | INV | 3  | N/A | Yes |
| 28 | 2 | 8  | 40,087,838  | 8  | 119,896,781 | 79,808,943 | INV | 4  | N/A | Yes |
| 28 | 2 | 8  | 42,219,254  | 8  | 42,537,282  | 318,028    | DEL | 4  | N/A | Yes |
| 28 | 2 | 8  | 107,232,675 | 8  | 115,664,954 | 8,432,279  | INV | 4  | N/A | Yes |
| 28 | 2 | 8  | 42,684,185  | 8  | 47,378,680  | 4,694,495  | DEL | 5  | N/A | Yes |
| 28 | 2 | 8  | 41,352,306  | 8  | 119,468,390 | 78,116,084 | DEL | 7  | N/A | Yes |
| 28 | 2 | 8  | 108,063,856 | 8  | 119,962,758 | 11,898,902 | INV | 7  | N/A | Yes |
| 28 | 2 | 11 | 61,841,815  | 14 | 81,784,103  | N/A        | CTX | 5  | N/A | Yes |
| 28 | 2 | 12 | 28,142,935  | 12 | 28,233,850  | 90,915     | INV | 10 | N/A | No  |
| 28 | 2 | 12 | 15,728,835  | 12 | 27,920,974  | 12,192,139 | INV | 11 | N/A | No  |
| 28 | 2 | 12 | 28,149,131  | 12 | 28,208,938  | 59,807     | INV | 11 | N/A | No  |
| 28 | 2 | 12 | 4,347,749   | 12 | 4,388,753   | 41,004     | DEL | 12 | N/A | No  |
| 28 | 2 | 12 | 15,766,773  | 12 | 28,086,973  | 12,320,200 | ITX | 12 | N/A | No  |
| 28 | 2 | 12 | 4,355,223   | 12 | 27,836,020  | 23,480,797 | INV | 13 | N/A | No  |

|    |   |    |             |    |             |            |     |    |     |     |
|----|---|----|-------------|----|-------------|------------|-----|----|-----|-----|
| 28 | 2 | 12 | 4,209,379   | 12 | 28,343,467  | 24,134,088 | ITX | 15 | N/A | No  |
| 28 | 2 | 12 | 27,824,315  | 12 | 27,981,093  | 156,778    | DEL | 16 | N/A | No  |
| 28 | 2 | 12 | 4,434,628   | 12 | 43,476,441  | 39,041,813 | DEL | 23 | N/A | No  |
| 28 | 2 | 12 | 15,797,051  | 12 | 27,666,108  | 11,869,057 | DEL | 26 | N/A | No  |
| 28 | 2 | 22 | 22,700,813  | 22 | 22,752,223  | 51,410     | ITX | 2  | N/A | Yes |
| 29 | 2 | 1  | 850,051     | 1  | 3,634,221   | 2,784,170  | INV | 3  | N/A | Yes |
| 29 | 2 | 2  | 201,406,407 | 13 | 59,640,949  | N/A        | CTX | 2  | N/A | No  |
| 29 | 2 | 2  | 218,567,435 | 2  | 220,713,459 | 2,146,024  | INV | 3  | N/A | Yes |
| 29 | 2 | 3  | 36,323,064  | 3  | 46,366,130  | 10,043,066 | DEL | 2  | N/A | Yes |
| 29 | 2 | 3  | 46,372,436  | 3  | 49,153,472  | 2,781,036  | INV | 4  | N/A | Yes |
| 29 | 2 | 3  | 36,872,783  | 3  | 38,170,567  | 1,297,784  | ITX | 7  | N/A | Yes |
| 29 | 2 | 13 | 26,523,960  | 13 | 85,856,260  | 59,332,300 | DEL | 2  | N/A | No  |
| 29 | 2 | 13 | 33,090,332  | 13 | 59,042,060  | 25,951,728 | INV | 2  | N/A | No  |
| 29 | 2 | 13 | 33,740,272  | 13 | 54,529,373  | 20,789,101 | INV | 2  | N/A | No  |
| 29 | 2 | 13 | 36,751,832  | 13 | 96,892,395  | 60,140,563 | INV | 2  | N/A | No  |
| 29 | 2 | 13 | 47,855,840  | 13 | 112,148,331 | 64,292,491 | INV | 3  | N/A | No  |
| 29 | 2 | 13 | 47,865,586  | 13 | 49,013,788  | 1,148,202  | INV | 3  | N/A | No  |
| 29 | 2 | 13 | 63,859,980  | 13 | 67,311,568  | 3,451,588  | INV | 3  | N/A | No  |
| 29 | 2 | 13 | 69,202,753  | 13 | 85,543,411  | 16,340,658 | DEL | 3  | N/A | No  |
| 29 | 2 | 13 | 77,956,326  | 13 | 81,861,275  | 3,904,949  | ITX | 3  | N/A | No  |
| 29 | 2 | 13 | 78,877,239  | 13 | 113,321,390 | 34,444,151 | INV | 3  | N/A | No  |
| 29 | 2 | 13 | 43,242,545  | 13 | 63,849,050  | 20,606,505 | DEL | 4  | N/A | No  |
| 29 | 2 | 13 | 70,834,368  | 13 | 75,263,383  | 4,429,015  | INV | 4  | N/A | No  |
| 29 | 2 | 13 | 75,290,525  | 13 | 97,029,030  | 21,738,505 | INV | 4  | N/A | No  |
| 29 | 2 | 13 | 85,198,141  | 13 | 106,946,020 | 21,747,879 | ITX | 7  | N/A | No  |
| 29 | 2 | 13 | 85,831,787  | 13 | 96,899,055  | 11,067,268 | DEL | 7  | N/A | No  |
| 29 | 2 | 13 | 85,534,542  | 13 | 87,721,266  | 2,186,724  | INV | 8  | N/A | No  |

<sup>#</sup>The reported amplitude may be a result of more than one rearrangements spanning the same area.

<sup>\*</sup>ND Not done. Plasma DNA not analyzed due difficulties in designing sensitive assays, due to low complexity regions or repeat regions or no more DNA to analyze

<sup>\$</sup> Preserved in early, but not late metastasis

<sup>\*\*</sup>N/A Not applicable. No tissue or plasma available
